# Supplementary material for: Testing relationship recognition in wild jackdaws (Corvus monedula)
Source: PubMed Central journal article supplement (PMC6491552; doi:10.1038/s41598-019-43247-x), 2019-04-30
Supplement: 41598_2019_43247_MOESM1_ESM.pdf [file 41598_2019_43247_MOESM1_ESM.pdf]

# Testing relationship recognition in wild jackdaws (*Corvus monedula*)

Victoria E. Lee<sup>a\*</sup>, Guillam E. McIvor<sup>a</sup> & Alex Thornton<sup>a</sup>

<sup>a</sup>College of Life and Environmental Sciences, University of Exeter, Penryn Campus, Penryn,  
Cornwall, UK TR10 9FE.

\*Email correspondence: [vel202@exeter.ac.uk](mailto:vel202@exeter.ac.uk)

## Supplementary Material

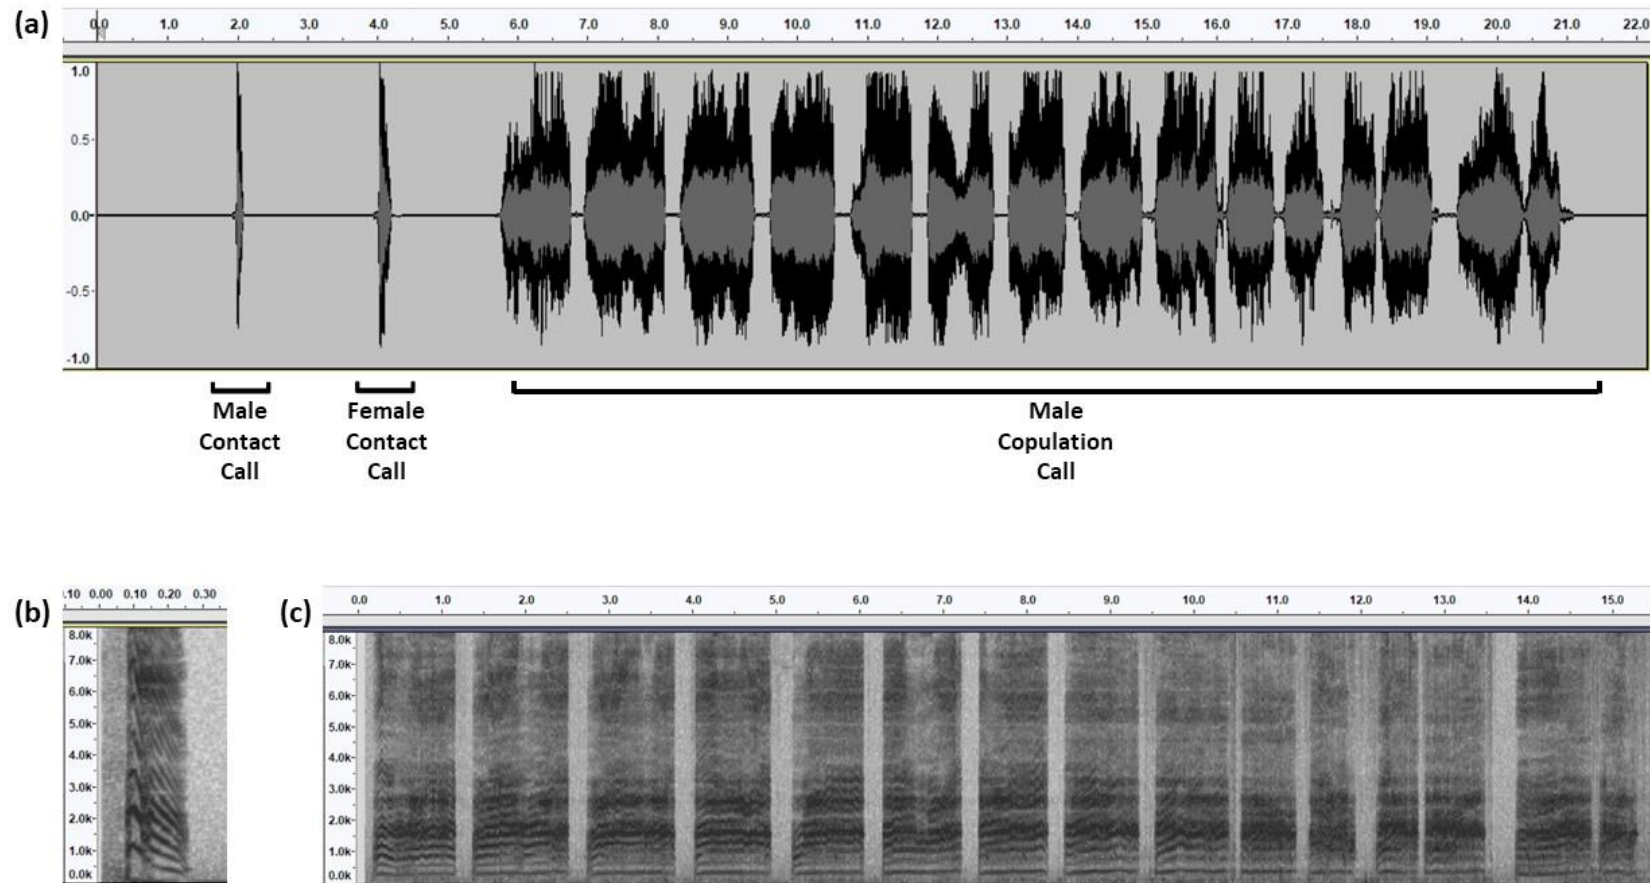

**Fig. S1: Diagram showing structure of playbacks.** a) Waveform of a playback track simulating infidelity at a neighbouring nest box. Each sequence was comprised of a male contact call, a female contact call and a copulation call from the same male. Male copulation calls varied in length; this variation was retained to avoid over-editing important call features and was later controlled for statistically; b) Spectrogram of a jackdaw contact call; c) Spectrogram of a jackdaw copulation call.
